# Supplementary material for: How to induce highly efficient long-lasting phosphorescence in a lamp with a commercial phosphor: a facile method and fundamental mechanisms
Source: Royal Society of Chemistry journal article supplement (doi:10.1039/c5tc01420d), 2015-01-01
Supplement: c5tc01420d1.pdf [file c5tc01420d1.pdf]

## Supporting information

**Table S1.** Recently reported green LLP phosphors and their LLP performances.

| Phosphors                                                                             | LLP emission (nm) | LLP duration (h) | references |
|---------------------------------------------------------------------------------------|-------------------|------------------|------------|
| $\text{Li}_2\text{CaGeO}_4:\text{Tb}^{3+}$                                            | 543               | 1                | 19         |
| $\text{Ca}_{14}\text{Mg}_2(\text{SiO}_4)_8:\text{Eu}^{2+},\text{Dy}^{3+}$             | 523               | 1                | 20         |
| $\text{Y}_3\text{Sc}_2\text{Ga}_3\text{AlO}_{12}:\text{Ce}^{3+}$                      | 495               | 1-2              | 21         |
| $\text{YTaO}_4:\text{Tb}^{3+}$                                                        | 543               | 2                | 22         |
| $\text{Zn}_2\text{GeO}_4:\text{Mn}^{2+}$                                              | 528               | 2                | 23         |
| $\text{ZnS}:\text{Cu}^+$                                                              | 530               | 3                | 24-25      |
| $\text{Ca}_2\text{SnO}_4:\text{Tb}^{3+}$                                              | 545               | 3                | 26         |
| $\text{CaS}:\text{Sm}^{3+}$                                                           | 569               | 3                | 27         |
| $\text{CaSnO}_3:\text{Tb}^{3+}$                                                       | 543               | 4                | 28         |
| $\text{CaZnGe}_2\text{O}_6:\text{Tb}^{3+}$                                            | 552               | 4                | 29         |
| $\text{Mg}_2\text{SnO}_4:\text{Mn}^{2+}$                                              | 500               | 5                | 30         |
| $\text{Ca}_8\text{Mg}(\text{SiO}_4)_4\text{C}_{12}:\text{Eu}^{2+},\text{Nd}^{3+}$     | 504               | 5                | 31         |
| $\text{CdSiO}_3:\text{Tb}^{3+}$                                                       | 540               | 5                | 6          |
| $\text{SrAl}_2\text{O}_4:\text{Ce}^{3+},\text{Mn}^{2+}$                               | 515               | 5                | 32         |
| $\text{CaAl}_2\text{O}_4:\text{Ce}^{3+},\text{Mn}^{2+}/\text{Ce}^{3+},\text{Tb}^{3+}$ | 525 / 543         | 10               | 33-34      |
| $\text{Zn}_{11}\text{B}_8\text{Si}_5\text{O}_{33}:\text{Mn}^{2+}$                     | 525               | 12               | 35         |
| $\text{Lu}_2\text{O}_3:\text{Tb}^{3+},\text{Ca}^{2+}$                                 | 543               | 15               | 4          |
| $\text{Zn}_2\text{SiO}_4:\text{Mn}^{2+},\text{Yb}^{3+}$                               | 523               | 30               | This work  |

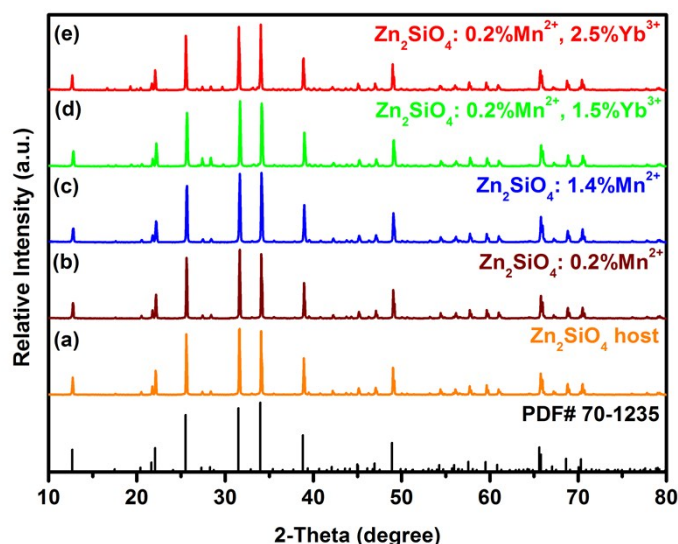

**Figure S1.** The X-ray diffraction patterns of (a)  $\text{Zn}_2\text{SiO}_4$  host, (b), (c)  $\text{Zn}_2\text{SiO}_4:\text{Mn}^{2+}$  (d), (e),  $\text{Zn}_2\text{SiO}_4:\text{Mn}^{2+},\text{Yb}^{3+}$ , and the JCPDS card.

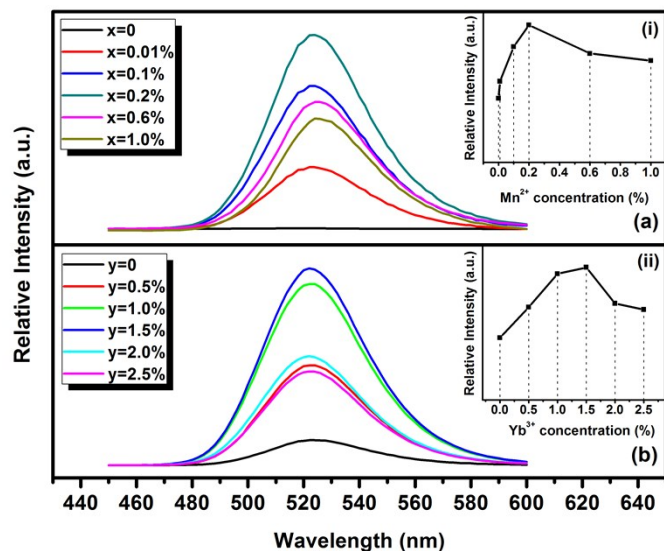

Figure S2. (a) The LLP emission spectra of  $\text{Zn}_2\text{SiO}_4:\text{xMn}^{2+}$  ( $x = 0, 0.01\%, 0.1\%, 0.2\%, 0.6\%$ , and  $1.0\%$ ). (b) The LLP emission spectra of  $\text{Zn}_2\text{SiO}_4:0.2\%\text{Mn}^{2+}, \text{yYb}^{3+}$  ( $y = 0, 0.5\%, 1.0\%, 1.5\%, 2.0\%$ , and  $2.5\%$ ). Both recorded at 30 s after UV irradiation for 60 s.

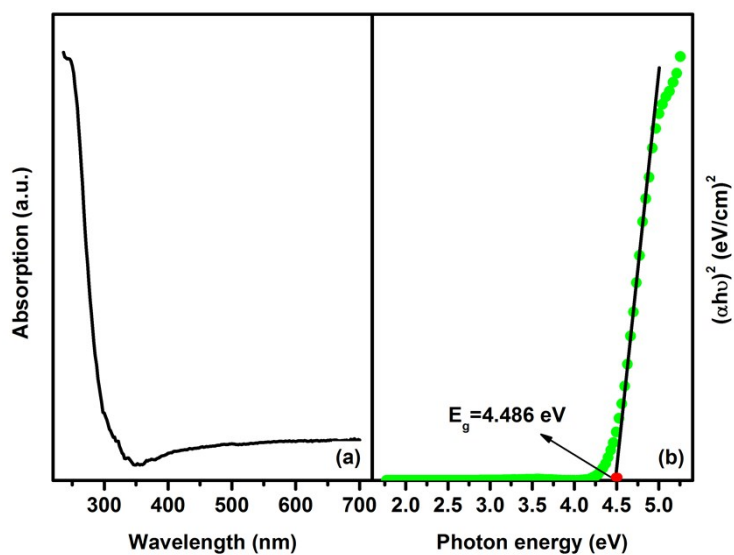

**Figure S3.** (a) The UV–Vis absorption spectra of  $\text{Zn}_2\text{SiO}_4$  host. (b) Plot of  $(\alpha h\nu)^2$  vs photon energy.
